# Supplementary material for: The Impact of Partial Splenic Embolization on Portal Hypertensive Gastropathy in Cirrhotic Patients with Portal Hypertension
Source: MDPI journal article supplement (doi:10.3390/jcm12072662), 2023-04-03
Supplement: s1 [file s1]

**Table S1.** Efficacy of partial splenic embolization on portal hypertensive gastropathy based on Child–Pugh score.

|                    | Improved group | Non-improved group | Amelioration rate (%) |
|--------------------|----------------|--------------------|-----------------------|
| Child–Pugh score 5 | 5              | 1                  | 83                    |
| Child–Pugh score 6 | 5              | 1                  | 83                    |
| Child–Pugh score 7 | 5              | 5                  | 50                    |
| Child–Pugh score 8 | 3              | 3                  | 50                    |
| Child–Pugh score 9 | 0              | 3                  | 0                     |
